# Supplementary material for: Gene‐Metabolite Network Linked to Inhibited Bioenergetics in Association With Spaceflight‐Induced Loss of Male Mouse Quadriceps Muscle
Source: PubMed Central journal article supplement (PMC7689867; doi:10.1002/jbmr.4102), 2020-07-30

Figure S1

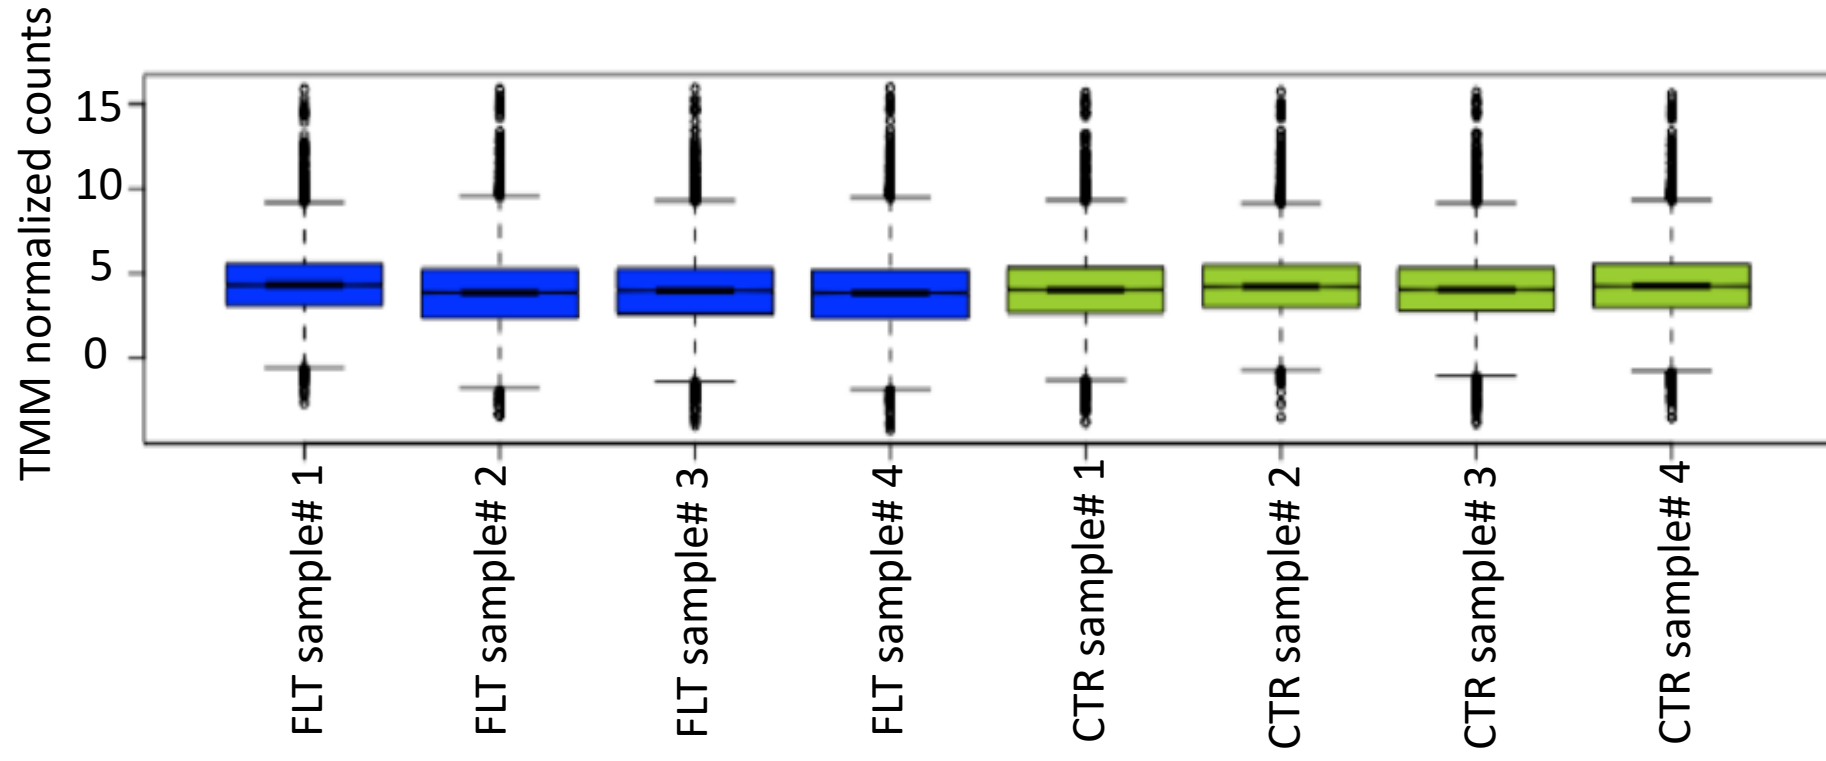

Supplement: JBMR-35-2049-s002.pdf [file JBMR-35-2049-s002.pdf]
