# Supplementary material for: Gene‐Metabolite Network Linked to Inhibited Bioenergetics in Association With Spaceflight‐Induced Loss of Male Mouse Quadriceps Muscle
Source: PubMed Central journal article supplement (PMC7689867; doi:10.1002/jbmr.4102), 2020-07-30
Supplement: JBMR-35-2049-s003.pdf [file JBMR-35-2049-s003.pdf]

**Table S1. Canonical networks co-enriched by gene and metabolites. The list is sorted in the descending order of z-score**

| Canonical Pathways                    | -log(p-value) | z-score | Number of molecules | Molecules                                                                                                                                                                                                                                                                              |
|---------------------------------------|---------------|---------|---------------------|----------------------------------------------------------------------------------------------------------------------------------------------------------------------------------------------------------------------------------------------------------------------------------------|
| EIF2 Signaling                        | 19.90         | 2.75    | 44                  | RPL11,RPL24,EIF2AK4,MAPK1,RPS18,EIF4A2,HSPA5,EIF4E,FGFR3,RPS28,RPL14,RPL27A,RPL35,RPL18A,RPL21,EIF3A,RPL36,RPL18,RPL31,MAP2K1,EIF1AY,EIF2AK1,FGFR1,EIF5B,RPS8,RPL17,EIF4G3,RPS21,RPL37A,RAP1A,RPS29,RPL28,EIF3M,RPS15,PTPN11,RPS26,PPP1R15A,RPS15A,RPL37,RPS25,RPL13A,EIF3L,RPSA,EIF3K |
| D-myo-inositol-5-phosphate Metabolism | 3.65          | 1.50    | 16                  | SOCS3,ATP,PPP1R1A,ADP,MDP1,NT5C,STYX,MTMR6,CA3,PLCD3,PTPN11,PPP1R7,DUSP13,DUSP10,PLCD4,PTPN22                                                                                                                                                                                          |
| Prolactin Signaling                   | 3.45          | -1.51   | 11                  | FGFR3,FOS,SOCS3,SOCS1,PTPN11,MAPK1,FGFR1,JAK2,STAT5B,MAP2K1,RAP1A                                                                                                                                                                                                                      |

|                                                             |      |       |    |                                                                                                      |
|-------------------------------------------------------------|------|-------|----|------------------------------------------------------------------------------------------------------|
| ILK Signaling                                               | 4.27 | -1.61 | 19 | MYH4,PXN,FN1,MAPK1,MYL2,PPP2CA,ACTN2,FGFR1,MYH7,MYH7B,FGFR3,FOS,MYH2,RHOQ,CFL2,PTPN11,RHOB,MYL4,MYH1 |
| Neuregulin Signaling                                        | 1.30 | -1.63 | 7  | MAPK1,PTPN11,ERRFI1,CRK,STAT5B,MAP2K1,RAP1A                                                          |
| ErbB4 Signaling                                             | 1.66 | -1.63 | 7  | FGFR3,YAP1,MAPK1,PTPN11,FGFR1,MAP2K1,RAP1A                                                           |
| TCA Cycle II (Eukaryotic)                                   | 2.55 | -1.63 | 6  | SDHA,SUCLA2,ATP,ADP,DLD,SDHD                                                                         |
| Pyrimidine Ribonucleotides Interconversion                  | 3.29 | -1.63 | 8  | SMARCA1,NUDT18,ATP,ENTPD6,ADP,CMPK1,PCK1,ZRANB3                                                      |
| NGF Signaling                                               | 1.45 | -1.67 | 9  | FGFR3,PTPN11,MAPK1,FGFR1,TRIO,CRK,MAP2K1,RAP1A,MAP3K3                                                |
| Renin-Angiotensin Signaling                                 | 1.68 | -1.67 | 10 | FGFR3,FOS,ADCY2,ATP,PTPN11,MAPK1,FGFR1,JAK2,MAP2K1,RAP1A                                             |
| Role of NANOG in Mammalian Embryonic Stem Cell Pluripotency | 1.87 | -1.67 | 10 | FGFR3,IL6ST,PTPN11,MAPK1,FGFR1,WNT4,JAK2,FOXD3,MAP2K1,RAP1A                                          |
| IL-8 Signaling                                              | 1.58 | -1.73 | 13 | FGFR3,FOS,RHOQ,MYL2,PTPN11,RHOB,MAPK1,FGFR1,ITGAV,MAP2K1,RAP1A,VASP,IRAK2                            |

|                                                   |      |       |    |                                                                                                                                   |
|---------------------------------------------------|------|-------|----|-----------------------------------------------------------------------------------------------------------------------------------|
| STAT3 Pathway                                     | 3.74 | -1.73 | 14 | IL6ST,SOCS1,SOCS3,IL4R,MAPK1,FGFR1, JAK2,RAP1A,FGFR3,PI3M1,NTRK3,CDKN1A,CISH,MAP2K1                                               |
| CXCR4 Signaling                                   | 3.34 | -1.81 | 16 | ADCY2,PXN,ATP,MAPK1,MYL2,FGFR1,CRK,RAP1A,FGFR3,FOS,RHOQ,PTPN11,RHOB,MYL4,MAP2K1,MYL12A                                            |
| Oxidative Phosphorylation                         | 4.88 | -1.81 | 15 | SDHA,NDUFS1,NDUFB7,COX5A,SDHD,NDUFB6,UQCRFS1,NDUFA3,ATP5S,ATP5PB,ATP5MC3,COX6A2                                                   |
| Actin Cytoskeleton Signaling                      | 5.73 | -1.88 | 24 | MYH4,PXN,FN1,MAPK1,MYL2,FGF9,ACTN2,FGFR1,RDX,TRIO,CRK,MYH7,SLC9A1,RAP1A,MYH7B,FGFR3,MYH2,CFL2,PTPN11,MYL4,PFN2,MAP2K1,MYH1,MYL12A |
| FGF Signaling                                     | 1.34 | -1.89 | 7  | FGFR3,MAPK1,PTPN11,FGFR1,FGF9,CRK,MAP2K1                                                                                          |
| Antiproliferative Role of Somatostatin Receptor 2 | 1.45 | -1.89 | 7  | FGFR3,MAPK1,PTPN11,FGFR1,CDKN1A,MAP2K1,RAP1A                                                                                      |

|                                         |      |       |    |                                                                                                                                           |
|-----------------------------------------|------|-------|----|-------------------------------------------------------------------------------------------------------------------------------------------|
| Th1 Pathway                             | 2.11 | -1.90 | 11 | FGFR3,SOCS3,SOCS1,NOTCH4,NFIL3,PTPN11,FGFR1,HLA-DQA1,NFATC2,JAK2,HLA-DRB5                                                                 |
| JAK/Stat Signaling                      | 4.90 | -1.94 | 13 | SOCS1,SOCS3,MAPK1,FGFR1,JAK2,RAP1A,FGFR3,FOS,PTPN11,CDKN1A,CISH,STAT5B,MAP2K1                                                             |
| NRF2-mediated Oxidative Stress Response | 6.34 | -2.11 | 23 | GSTM1,MAPK1,GSTM5,DNAJB4,FGFR1,NQO1,HERPUD1,GCLC,DNAJA1,RAP1A,TXNRD1,BACH1,FGFR3,CUL3,FOS,GSTM2,PTPN11,CAT,JUND,DNAJA2,AOX1,DNAJB6,MAP2K1 |
| Integrin Signaling                      | 3.64 | -2.36 | 19 | PXN,MAPK1,MYL2,ACTN2,FGFR1,CRK,RAP1A,FGFR3,WIPF1,RHOQ,RHOB,PTPN11,ITGAV,PFN2,CAPN7,TSPAN4,MAP2K1,VASP,MYL12A                              |

**Table S2A. The non-canonical networks linked to musculoskeletal operations. Each table includes the gene symbol and gene name, and sorted based on their fold changes transformed to log scale base 2. (A) Protein metabolism network was enriched by 44 upregulated and 53 downregulated biomolecules. The biomolecules included 113 genes and 7 metabolites.**

| Gene symbol | Entrez Gene Name                                      | Expr Log Ratio |
|-------------|-------------------------------------------------------|----------------|
| SOCS1       | suppressor of cytokine signaling 1                    | 2.023          |
| FOS         | Fos proto-oncogene, AP-1 transcription factor subunit | 1.918          |
| CDKN1A      | cyclin dependent kinase inhibitor 1A                  | 1.558          |
| ARNTL       | aryl hydrocarbon receptor nuclear translocator like   | 1.531          |
| IGF2BP2     | insulin like growth factor 2 mRNA binding protein 2   | 1.504          |
| SOCS3       | suppressor of cytokine signaling 3                    | 1.319          |
| FST         | follistatin                                           | 1.238          |
| FAM83D      | family with sequence similarity 83 member D           | 1.152          |
| TP63        | tumor protein p63                                     | 1.086          |
| HDAC8       | histone deacetylase 8                                 | 1.08           |
| AURKA       | aurora kinase A                                       | 1.047          |
| PIM1        | Pim-1 proto-oncogene, serine/threonine kinase         | 1.003          |
| UBC         | ubiquitin C                                           | 0.892          |
| PPP1R15A    | protein phosphatase 1 regulatory subunit 15A          | 0.883          |
| MVK         | mevalonate kinase                                     | 0.787          |
| MMP15       | matrix metalloproteinase 15                           | 0.711          |
| RCN3        | reticulocalbin 3                                      | 0.678          |
| FBXW7       | F-box and WD repeat domain containing 7               | 0.664          |
| RPL37       | ribosomal protein L37                                 | 0.624          |
| FAM20C      | FAM20C, golgi associated secretory pathway kinase     | 0.61           |
| MRPL23      | mitochondrial ribosomal protein L23                   | 0.596          |
| TRIM63      | tripartite motif containing 63                        | 0.589          |
| RPS26       | ribosomal protein S26                                 | 0.585          |
| USP13       | ubiquitin specific peptidase 13                       | 0.575          |
| SDC4        | syndecan 4                                            | 0.573          |
| RPL28       | ribosomal protein L28                                 | 0.571          |
| ERRFI1      | ERBB receptor feedback inhibitor 1                    | 0.533          |
| RARA        | retinoic acid receptor alpha                          | 0.532          |
| IGFBP6      | insulin like growth factor binding protein 6          | 0.522          |
| MFGE8       | milk fat globule-EGF factor 8 protein                 | 0.518          |
| EIF5B       | eukaryotic translation initiation factor 5B           | 0.51           |
| RPL11       | ribosomal protein L11                                 | 0.506          |
| RPL35       | ribosomal protein L35                                 | 0.502          |
| KLHL8       | kelch like family member 8                            | 0.5            |
| RPL13A      | ribosomal protein L13a                                | 0.497          |
| ANO8        | anoctamin 8                                           | 0.493          |
| SMAD3       | SMAD family member 3                                  | 0.493          |
| SAMD4A      | sterile alpha motif domain containing 4A              | 0.486          |
| RPL14       | ribosomal protein L14                                 | 0.485          |
| MAN1B1      | mannosidase alpha class 1B member 1                   | 0.484          |

|                     |                                                                   |        |
|---------------------|-------------------------------------------------------------------|--------|
| RPS8                | ribosomal protein S8                                              | 0.481  |
| EIF3K               | eukaryotic translation initiation factor 3 subunit K              | 0.478  |
| RPL21               | ribosomal protein L21                                             | 0.473  |
| RPS29               | ribosomal protein S29                                             | 0.461  |
| RPS15               | ribosomal protein S15                                             | 0.45   |
| RPL18A              | ribosomal protein L18a                                            | 0.445  |
| EIF2AK1             | eukaryotic translation initiation factor 2 alpha kinase 1         | 0.438  |
| RPL24               | ribosomal protein L24                                             | 0.437  |
| RPL37A              | ribosomal protein L37a                                            | 0.436  |
| RPL18               | ribosomal protein L18                                             | 0.434  |
| PSMB3               | proteasome subunit beta 3                                         | 0.428  |
| RPL17               | ribosomal protein L17                                             | 0.416  |
| RPL27A              | ribosomal protein L27a                                            | 0.41   |
| RPS21               | ribosomal protein S21                                             | 0.41   |
| NEDD8               | neural precursor cell expressed, developmentally down-regulated 8 | 0.4    |
| TCOF1               | treacle ribosome biogenesis factor 1                              | 0.395  |
| RPSA                | ribosomal protein SA                                              | 0.394  |
| RPS28               | ribosomal protein S28                                             | 0.393  |
| TGM2                | transglutaminase 2                                                | 0.393  |
| RPS15A              | ribosomal protein S15a                                            | 0.385  |
| RPL36               | ribosomal protein L36                                             | 0.383  |
| RPL31               | ribosomal protein L31                                             | 0.375  |
| AURKAIP1            | aurora kinase A interacting protein 1                             | 0.373  |
| RPS18               | ribosomal protein S18                                             | 0.367  |
| MAPT                | microtubule associated protein tau                                | 0.364  |
| RPS25               | ribosomal protein S25                                             | 0.362  |
| EIF4G3              | eukaryotic translation initiation factor 4 gamma 3                | 0.361  |
| L-alanine           | --                                                                | -0.288 |
| ATP                 | --                                                                | -0.347 |
| HSPA5               | heat shock protein family A (Hsp70) member 5                      | -0.359 |
| PSMD14              | proteasome 26S subunit, non-ATPase 14                             | -0.363 |
| EIF3L               | eukaryotic translation initiation factor 3 subunit L              | -0.378 |
| MAPK1               | mitogen-activated protein kinase 1                                | -0.388 |
| HERPUD1             | homocysteine inducible ER protein with ubiquitin like domain 1    | -0.401 |
| CCT4                | chaperonin containing TCP1 subunit 4                              | -0.41  |
| RTN4                | reticulon 4                                                       | -0.415 |
| UBR2                | ubiquitin protein ligase E3 component n-recogin 2                 | -0.428 |
| EIF4E               | eukaryotic translation initiation factor 4E                       | -0.447 |
| PPP1R2              | protein phosphatase 1 regulatory inhibitor subunit 2              | -0.447 |
| TARBP2              | TARBP2, RISC loading complex RNA binding subunit                  | -0.456 |
| CUL3                | cullin 3                                                          | -0.485 |
| EIF3M               | eukaryotic translation initiation factor 3 subunit M              | -0.506 |
| niacinamide         | --                                                                | -0.514 |
| PTPN11              | protein tyrosine phosphatase, non-receptor type 11                | -0.515 |
| cholesterol sulfate | --                                                                | -0.521 |
| CAPN7               | calpain 7                                                         | -0.528 |
| USP25               | ubiquitin specific peptidase 25                                   | -0.533 |

|                    |                                                                    |        |
|--------------------|--------------------------------------------------------------------|--------|
| UBE2G1             | ubiquitin conjugating enzyme E2 G1                                 | -0.544 |
| PPP2CA             | protein phosphatase 2 catalytic subunit alpha                      | -0.545 |
| EIF3A              | eukaryotic translation initiation factor 3 subunit A               | -0.547 |
| STX12              | syntaxin 12                                                        | -0.549 |
| SPCS1              | signal peptidase complex subunit 1                                 | -0.553 |
| UCHL3              | ubiquitin C-terminal hydrolase L3                                  | -0.557 |
| EIF4A2             | eukaryotic translation initiation factor 4A2                       | -0.567 |
| MAP2K1             | mitogen-activated protein kinase kinase 1                          | -0.568 |
| EIF2AK4            | eukaryotic translation initiation factor 2 alpha kinase 4          | -0.577 |
| CANX               | calnexin                                                           | -0.582 |
| BAG3               | BCL2 associated athanogene 3                                       | -0.586 |
| ERLEC1             | endoplasmic reticulum lectin 1                                     | -0.589 |
| NGLY1              | N-glycanase 1                                                      | -0.601 |
| SOX17              | SRY-box 17                                                         | -0.627 |
| CRK                | CRK proto-oncogene, adaptor protein                                | -0.645 |
| FN1                | fibronectin 1                                                      | -0.65  |
| DLD                | dihydrolipoamide dehydrogenase                                     | -0.675 |
| TPP2               | tripeptidyl peptidase 2                                            | -0.695 |
| CAT                | catalase                                                           | -0.761 |
| CNOT7              | CCR4-NOT transcription complex subunit 7                           | -0.812 |
| GJA1               | gap junction protein alpha 1                                       | -0.821 |
| saquinavir         | --                                                                 | -0.828 |
| PLAU               | plasminogen activator, urokinase                                   | -0.838 |
| PFN2               | profilin 2                                                         | -0.847 |
| UBR1               | ubiquitin protein ligase E3 component n-recogin 1                  | -0.855 |
| ATP1B1             | ATPase Na <sup>+</sup> /K <sup>+</sup> transporting subunit beta 1 | -0.863 |
| NAGLU              | N-acetyl-alpha-glucosaminidase                                     | -0.9   |
| JAK2               | Janus kinase 2                                                     | -0.911 |
| L2HGDH             | L-2-hydroxyglutarate dehydrogenase                                 | -0.924 |
| ADP                | --                                                                 | -0.935 |
| CCT6A              | chaperonin containing TCP1 subunit 6A                              | -1.21  |
| PER3               | period circadian regulator 3                                       | -1.534 |
| methylprednisolone | --                                                                 | -1.542 |

**Table S2B. The non-canonical networks linked to musculoskeletal operations. Each table includes the gene symbol and gene name, and sorted based on their fold changes transformed to log scale base 2. (B) Carbohydrate metabolism network was enriched by 47 upregulated and 70 downregulated biomolecules. The biomolecules included 105 genes and 12 metabolites.**

| Gene symbol | Entrez Gene Name                                                     | Expr Log Ratio |
|-------------|----------------------------------------------------------------------|----------------|
| SOCS1       | suppressor of cytokine signaling 1                                   | 2.023          |
| RRAD        | RRAD, Ras related glycolysis inhibitor and calcium channel regulator | 1.755          |
| PNPLA3      | patatin like phospholipase domain containing 3                       | 1.74           |
| UCN2        | urocortin 2                                                          | 1.556          |
| ARNTL       | aryl hydrocarbon receptor nuclear translocator like                  | 1.531          |
| IGF2BP2     | insulin like growth factor 2 mRNA binding protein 2                  | 1.504          |
| NEU3        | neuraminidase 3                                                      | 1.32           |
| SOCS3       | suppressor of cytokine signaling 3                                   | 1.319          |
| NR1D1       | nuclear receptor subfamily 1 group D member 1                        | 1.137          |
| ABCB1       | ATP binding cassette subfamily B member 1                            | 1.051          |
| ACVR2B      | activin A receptor type 2B                                           | 1.019          |
| DYRK2       | dual specificity tyrosine phosphorylation regulated kinase 2         | 0.966          |
| PPP1R3C     | protein phosphatase 1 regulatory subunit 3C                          | 0.943          |
| ENHO        | energy homeostasis associated                                        | 0.935          |
| ADCY2       | adenylate cyclase 2                                                  | 0.888          |
| PPP1R15A    | protein phosphatase 1 regulatory subunit 15A                         | 0.883          |
| CHST12      | carbohydrate sulfotransferase 12                                     | 0.826          |
| EGLN3       | egl-9 family hypoxia inducible factor 3                              | 0.727          |
| FGFR1       | fibroblast growth factor receptor 1                                  | 0.725          |
| ACACA       | acetyl-CoA carboxylase alpha                                         | 0.704          |
| PBX1        | PBX homeobox 1                                                       | 0.704          |
| SORT1       | sortilin 1                                                           | 0.691          |
| Foxp1       | forkhead box P1                                                      | 0.626          |
| PFKFB3      | 6-phosphofructo-2-kinase/fructose-2,6-biphosphatase 3                | 0.612          |
| HS6ST1      | heparan sulfate 6-O-sulfotransferase 1                               | 0.609          |
| VAC14       | Vac14, PIKFYVE complex component                                     | 0.6            |
| SLC9A1      | solute carrier family 9 member A1                                    | 0.585          |
| SDC4        | syndecan 4                                                           | 0.573          |
| PRKAG3      | protein kinase AMP-activated non-catalytic subunit gamma 3           | 0.565          |
| TFEB        | transcription factor EB                                              | 0.536          |
| IL4R        | interleukin 4 receptor                                               | 0.523          |
| FMOD        | fibromodulin                                                         | 0.519          |
| APOD        | apolipoprotein D                                                     | 0.516          |
| B3GAT3      | beta-1,3-glucuronyltransferase 3                                     | 0.507          |
| FN3K        | fructosamine 3 kinase                                                | 0.499          |
| MIF         | macrophage migration inhibitory factor                               | 0.494          |
| SMAD3       | SMAD family member 3                                                 | 0.493          |
| BSG         | basigin (Ok blood group)                                             | 0.49           |
| BSCL2       | BSCL2, seipin lipid droplet biogenesis associated                    | 0.487          |



|                         |                                                       |        |
|-------------------------|-------------------------------------------------------|--------|
| MAN1B1                  | mannosidase alpha class 1B member 1                   | 0.484  |
| PLCD4                   | phospholipase C delta 4                               | 0.474  |
| GRB10                   | growth factor receptor bound protein 10               | 0.441  |
| SIK3                    | SIK family kinase 3                                   | 0.43   |
| ALDOA                   | aldolase, fructose-bisphosphate A                     | 0.406  |
| HSF1                    | heat shock transcription factor 1                     | 0.391  |
| MDP1                    | magnesium dependent phosphatase 1                     | 0.39   |
| IL6ST                   | interleukin 6 signal transducer                       | 0.359  |
| pyruvalde<br>hyde       | --                                                    | -0.288 |
| alanine                 | --                                                    | -0.288 |
| ATP                     | --                                                    | -0.347 |
| HSPA5                   | heat shock protein family A (Hsp70) member 5          | -0.359 |
| MAPK1                   | mitogen-activated protein kinase 1                    | -0.388 |
| RAB14                   | RAB14, member RAS oncogene family                     | -0.395 |
| SH3GLB1                 | SH3 domain containing GRB2 like, endophilin B1        | -0.41  |
| SRSF2                   | serine and arginine rich splicing factor 2            | -0.411 |
| acetamin<br>ophen       | --                                                    | -0.424 |
| CHPT1                   | choline phosphotransferase 1                          | -0.44  |
| carnosine               | --                                                    | -0.451 |
| CXCL14                  | C-X-C motif chemokine ligand 14                       | -0.454 |
| HADH                    | hydroxyacyl-CoA dehydrogenase                         | -0.476 |
| P2RY2                   | purinergic receptor P2Y2                              | -0.477 |
| SERINC3                 | serine incorporator 3                                 | -0.49  |
| RHOQ                    | ras homolog family member Q                           | -0.493 |
| ST3GAL5                 | ST3 beta-galactoside alpha-2,3-sialyltransferase 5    | -0.497 |
| CPE                     | carboxypeptidase E                                    | -0.507 |
| PFKFB4                  | 6-phosphofructo-2-kinase/fructose-2,6-biphosphatase 4 | -0.514 |
| PTPN11                  | protein tyrosine phosphatase, non-receptor type 11    | -0.515 |
| KCNC1                   | potassium voltage-gated channel subfamily C member 1  | -0.523 |
| SLC23A2                 | solute carrier family 23 member 2                     | -0.528 |
| SYNJ2                   | synaptojanin 2                                        | -0.533 |
| MTMR6                   | myotubularin related protein 6                        | -0.543 |
| DGAT2                   | diacylglycerol O-acyltransferase 2                    | -0.547 |
| glycyrrhet<br>inic acid | --                                                    | -0.556 |
| MAP2K1                  | mitogen-activated protein kinase kinase 1             | -0.568 |
| NQO1                    | NAD(P)H quinone dehydrogenase 1                       | -0.581 |
| PFKFB2                  | 6-phosphofructo-2-kinase/fructose-2,6-biphosphatase 2 | -0.596 |
| SORBS1                  | sorbin and SH3 domain containing 1                    | -0.596 |
| CRY2                    | cryptochrome circadian regulator 2                    | -0.598 |
| WWP1                    | WW domain containing E3 ubiquitin protein ligase 1    | -0.603 |
| OSTM1                   | osteopetrosis associated transmembrane protein 1      | -0.607 |
| uridine                 | --                                                    | -0.657 |
| HK2                     | hexokinase 2                                          | -0.658 |
| PPP1R3A                 | protein phosphatase 1 regulatory subunit 3A           | -0.678 |

|                                |                                                                           |        |
|--------------------------------|---------------------------------------------------------------------------|--------|
| GCLC                           | glutamate-cysteine ligase catalytic subunit                               | -0.688 |
| PGK1                           | phosphoglycerate kinase 1                                                 | -0.749 |
| CAT                            | catalase                                                                  | -0.761 |
| psychosine                     | --                                                                        | -0.771 |
| PRKAB2                         | protein kinase AMP-activated non-catalytic subunit beta 2                 | -0.779 |
| HRASLS                         | HRAS like suppressor                                                      | -0.788 |
| ITGAV                          | integrin subunit alpha V                                                  | -0.793 |
| CNOT7                          | CCR4-NOT transcription complex subunit 7                                  | -0.812 |
| CHPF2                          | chondroitin polymerizing factor 2                                         | -0.822 |
| PLAU                           | plasminogen activator, urokinase                                          | -0.838 |
| 2-hydroxyhexadecanoic acid     | --                                                                        | -0.872 |
| ETNK1                          | ethanolamine kinase 1                                                     | -0.878 |
| gliclazide                     | --                                                                        | -0.878 |
| NAGLU                          | N-acetyl-alpha-glucosaminidase                                            | -0.9   |
| PYGB                           | glycogen phosphorylase B                                                  | -0.904 |
| 1-14:0 lysophosphatidylcholine | --                                                                        | -0.909 |
| JAK2                           | Janus kinase 2                                                            | -0.911 |
| ADP                            | --                                                                        | -0.935 |
| IRF5                           | interferon regulatory factor 5                                            | -0.97  |
| DPM1                           | dolichyl-phosphate mannosyltransferase subunit 1, catalytic               | -1.063 |
| NTRK3                          | neurotrophic receptor tyrosine kinase 3                                   | -1.084 |
| CCDC80                         | coiled-coil domain containing 80                                          | -1.137 |
| CEBPA                          | CCAAT enhancer binding protein alpha                                      | -1.149 |
| ESRRB                          | estrogen related receptor beta                                            | -1.271 |
| ATP2A2                         | ATPase sarcoplasmic/endoplasmic reticulum Ca <sup>2+</sup> transporting 2 | -1.275 |
| CES1                           | carboxylesterase 1                                                        | -1.307 |
| HSD11B1                        | hydroxysteroid 11-beta dehydrogenase 1                                    | -1.423 |
| INPP5J                         | inositol polyphosphate-5-phosphatase J                                    | -1.441 |
| POSTN                          | periostin                                                                 | -1.67  |
| TRARG1                         | trafficking regulator of GLUT4 (SLC2A4) 1                                 | -1.923 |
| GCK                            | glucokinase                                                               | -1.938 |
| PER2                           | period circadian regulator 2                                              | -2.426 |
| PCK1                           | phosphoenolpyruvate carboxykinase 1                                       | -3.131 |
| NNAT                           | neuronatin                                                                | -4.149 |

**Table S2C. The non-canonical networks linked to musculoskeletal operations. Each table includes the gene symbol and gene name, and sorted based on their fold changes transformed to log scale base 2. (C) Lipid metabolism network was enriched by 49 upregulated and 98 downregulated biomolecules. The biomolecules included 119 genes and 28 metabolites.**

| Gene symbol | Entrez Gene Name                                                     | Expr Log Ratio |
|-------------|----------------------------------------------------------------------|----------------|
| KLF5        | Kruppel like factor 5                                                | 2.288          |
| SOCS1       | suppressor of cytokine signaling 1                                   | 2.023          |
| FOS         | Fos proto-oncogene, AP-1 transcription factor subunit                | 1.918          |
| RRAD        | RRAD, Ras related glycolysis inhibitor and calcium channel regulator | 1.755          |
| PNPLA3      | patatin like phospholipase domain containing 3                       | 1.74           |
| NFIL3       | nuclear factor, interleukin 3 regulated                              | 1.663          |
| CYP26B1     | cytochrome P450 family 26 subfamily B member 1                       | 1.578          |
| CDKN1A      | cyclin dependent kinase inhibitor 1A                                 | 1.558          |
| UCN2        | urocortin 2                                                          | 1.556          |
| ARNTL       | aryl hydrocarbon receptor nuclear translocator like                  | 1.531          |
| IGF2BP2     | insulin like growth factor 2 mRNA binding protein 2                  | 1.504          |
| TM6SF2      | transmembrane 6 superfamily member 2                                 | 1.441          |

|                              |                                                            |       |
|------------------------------|------------------------------------------------------------|-------|
| SEC14L2                      | SEC14 like lipid binding 2                                 | 1.374 |
| NEU3                         | neuraminidase 3                                            | 1.32  |
| SOCS3                        | suppressor of cytokine signaling 3                         | 1.319 |
| SLCO2A1                      | solute carrier organic anion transporter family member 2A1 | 1.268 |
| CADM1                        | cell adhesion molecule 1                                   | 1.157 |
| NR1D1                        | nuclear receptor subfamily 1 group D member 1              | 1.137 |
| PLVAP                        | plasmalemma vesicle associated protein                     | 1.128 |
| ABCB1                        | ATP binding cassette subfamily B member 1                  | 1.051 |
| PPP1R3C                      | protein phosphatase 1 regulatory subunit 3C                | 0.943 |
| ENHO                         | energy homeostasis associated                              | 0.935 |
| WNT4                         | Wnt family member 4                                        | 0.821 |
| MVK                          | mevalonate kinase                                          | 0.787 |
| ACACA                        | acetyl-CoA carboxylase alpha                               | 0.704 |
| SORT1                        | sortilin 1                                                 | 0.691 |
| oleoylethanolamide           | --                                                         | 0.665 |
| DHRS3                        | dehydrogenase/reductase 3                                  | 0.656 |
| DPEP1                        | dipeptidase 1                                              | 0.652 |
| STAT5B                       | signal transducer and activator of transcription 5B        | 0.636 |
| HS6ST1                       | heparan sulfate 6-O-sulfotransferase 1                     | 0.609 |
| VAC14                        | Vac14, PIKFYVE complex component                           | 0.6   |
| EBP                          | EBP, cholesterol delta-isomerase                           | 0.587 |
| SPHK2                        | sphingosine kinase 2                                       | 0.579 |
| TECR                         | trans-2,3-enoyl-CoA reductase                              | 0.547 |
| RARA                         | retinoic acid receptor alpha                               | 0.532 |
| IL4R                         | interleukin 4 receptor                                     | 0.523 |
| APOD                         | apolipoprotein D                                           | 0.516 |
| dioleoylphosphatidylglycerol | --                                                         | 0.497 |
| MIF                          | macrophage migration inhibitory factor                     | 0.494 |
| SMAD3                        | SMAD family member 3                                       | 0.493 |
| GCDH                         | glutaryl-CoA dehydrogenase                                 | 0.488 |

|                              |                                                   |        |
|------------------------------|---------------------------------------------------|--------|
| BSCL2                        | BSCL2, seipin lipid droplet biogenesis associated | 0.487  |
| NFATC2                       | nuclear factor of activated T cells 2             | 0.458  |
| GRB10                        | growth factor receptor bound protein 10           | 0.441  |
| SIK3                         | SIK family kinase 3                               | 0.43   |
| TGM2                         | transglutaminase 2                                | 0.393  |
| mono-(2-ethylhexyl)phthalate | --                                                | 0.249  |
| dibutyl phthalate            | --                                                | 0.249  |
| beta-alanine                 | --                                                | -0.288 |
| urethane                     | --                                                | -0.288 |
| hyperforin                   | --                                                | -0.302 |
| ATP                          | --                                                | -0.347 |
| HSPA5                        | heat shock protein family A (Hsp70) member 5      | -0.359 |
| acetic acid                  | --                                                | -0.388 |
| glycolaldehyde               | --                                                | -0.388 |
| MAPK1                        | mitogen-activated protein kinase 1                | -0.388 |
| RAB14                        | RAB14, member RAS oncogene family                 | -0.395 |
| SH3GLB1                      | SH3 domain containing GRB2 like, endophilin B1    | -0.41  |
| SRSF2                        | serine and arginine rich splicing factor 2        | -0.411 |
| RTN4                         | reticulon 4                                       | -0.415 |
| pyridoxamine                 | --                                                | -0.424 |
| acetaminophen                | --                                                | -0.424 |
| PDHB                         | pyruvate dehydrogenase E1 beta subunit            | -0.424 |
| CHPT1                        | choline phosphotransferase 1                      | -0.44  |
| carnosine                    | --                                                | -0.451 |
| CXCL14                       | C-X-C motif chemokine ligand 14                   | -0.454 |
| HADH                         | hydroxyacyl-CoA dehydrogenase                     | -0.476 |
| P2RY2                        | purinergic receptor P2Y2                          | -0.477 |
| DHRS11                       | dehydrogenase/reductase 11                        | -0.486 |
| gentian violet               | --                                                | -0.489 |
| RHOQ                         | ras homolog family member Q                       | -0.493 |
| ATP8A1                       | ATPase phospholipid transporting 8A1              | -0.497 |

|                   |                                                             |        |
|-------------------|-------------------------------------------------------------|--------|
| ST3GAL5           | ST3 beta-galactoside alpha-2,3-sialyltransferase 5          | -0.497 |
| PTGES2            | prostaglandin E synthase 2                                  | -0.499 |
| ACAT1             | acetyl-CoA acetyltransferase 1                              | -0.504 |
| CPE               | carboxypeptidase E                                          | -0.507 |
| niacinamide       | --                                                          | -0.514 |
| PTPN11            | protein tyrosine phosphatase, non-receptor type 11          | -0.515 |
| TEF               | TEF, PAR bZIP transcription factor                          | -0.516 |
| EXTL1             | exostosin like glycosyltransferase 1                        | -0.518 |
| SLC23A2           | solute carrier family 23 member 2                           | -0.528 |
| SYNJ2             | synaptojanin 2                                              | -0.533 |
| MTMR6             | myotubularin related protein 6                              | -0.543 |
| CCNY              | cyclin Y                                                    | -0.547 |
| DGAT2             | diacylglycerol O-acyltransferase 2                          | -0.547 |
| LGR4              | leucine rich repeat containing G protein-coupled receptor 4 | -0.548 |
| STX12             | syntaxin 12                                                 | -0.549 |
| glycyrrhetic acid | --                                                          | -0.556 |
| adenine           | --                                                          | -0.568 |
| MAP2K1            | mitogen-activated protein kinase kinase 1                   | -0.568 |
| ABCD3             | ATP binding cassette subfamily D member 3                   | -0.571 |
| PHYH              | phytanoyl-CoA 2-hydroxylase                                 | -0.571 |
| NQO1              | NAD(P)H quinone dehydrogenase 1                             | -0.581 |
| CANX              | calnexin                                                    | -0.582 |
| BAG3              | BCL2 associated athanogene 3                                | -0.586 |
| PFKFB2            | 6-phosphofructo-2-kinase/fructose-2,6-biphosphatase 2       | -0.596 |
| SORBS1            | sorbin and SH3 domain containing 1                          | -0.596 |
| CRY2              | cryptochrome circadian regulator 2                          | -0.598 |

|                                          |                                                           |        |
|------------------------------------------|-----------------------------------------------------------|--------|
| SDHA                                     | succinate dehydrogenase complex flavoprotein subunit A    | -0.604 |
| PLAA                                     | phospholipase A2 activating protein                       | -0.625 |
| SOX17                                    | SRY-box 17                                                | -0.627 |
| SSPN                                     | sarcospan                                                 | -0.629 |
| FN1                                      | fibronectin 1                                             | -0.65  |
| uridine                                  | --                                                        | -0.657 |
| DLD                                      | dihydrolipoamide dehydrogenase                            | -0.675 |
| SUCLA2                                   | succinate-CoA ligase ADP-forming beta subunit             | -0.702 |
| L-alpha-lysophosphatidylcholine, stearyl | --                                                        | -0.72  |
| TMEM30A                                  | transmembrane protein 30A                                 | -0.724 |
| CBR4                                     | carbonyl reductase 4                                      | -0.739 |
| DLAT                                     | dihydrolipoamide S-acetyltransferase                      | -0.758 |
| sphingosyl beta-glucoside                | --                                                        | -0.771 |
| psychosine                               | --                                                        | -0.771 |
| PRKAB2                                   | protein kinase AMP-activated non-catalytic subunit beta 2 | -0.779 |
| HRASLS                                   | HRAS like suppressor                                      | -0.788 |
| ITGAV                                    | integrin subunit alpha V                                  | -0.793 |
| LPGAT1                                   | lysophosphatidylglycerol acyltransferase 1                | -0.81  |
| QKI                                      | QKI, KH domain containing RNA binding                     | -0.821 |
| saquinavir                               | --                                                        | -0.828 |
| PLAU                                     | plasminogen activator, urokinase                          | -0.838 |
| UBR1                                     | ubiquitin protein ligase E3 component n-recogin 1         | -0.855 |
| ginsenoside Rb1                          | --                                                        | -0.861 |
| 2-hydroxyhexadecanoic acid               | --                                                        | -0.872 |
| ETNK1                                    | ethanolamine kinase 1                                     | -0.878 |
| NAGLU                                    | N-acetyl-alpha-glucosaminidase                            | -0.9   |
| JAK2                                     | Janus kinase 2                                            | -0.911 |
| HLF                                      | HLF, PAR bZIP transcription factor                        | -0.915 |
| ADP                                      | --                                                        | -0.935 |

|                                     |                                                                           |        |
|-------------------------------------|---------------------------------------------------------------------------|--------|
| ADH1C                               | alcohol dehydrogenase 1C (class I), gamma polypeptide                     | -0.944 |
| FGF9                                | fibroblast growth factor 9                                                | -0.995 |
| DPM1                                | dolichyl-phosphate mannosyltransferase subunit 1, catalytic               | -1.063 |
| CCDC80                              | coiled-coil domain containing 80                                          | -1.137 |
| CEBPA                               | CCAAT enhancer binding protein alpha                                      | -1.149 |
| cholestane-3beta,5alpha,6beta-triol | --                                                                        | -1.166 |
| IL15                                | interleukin 15                                                            | -1.176 |
| FGFR3                               | fibroblast growth factor receptor 3                                       | -1.267 |
| SLC16A1                             | solute carrier family 16 member 1                                         | -1.269 |
| ATP2A2                              | ATPase sarcoplasmic/endoplasmic reticulum Ca <sup>2+</sup> transporting 2 | -1.275 |
| CES1                                | carboxylesterase 1                                                        | -1.307 |
| NUDT7                               | nudix hydrolase 7                                                         | -1.419 |
| HSD11B1                             | hydroxysteroid 11-beta dehydrogenase 1                                    | -1.423 |
| INPP5J                              | inositol polyphosphate-5-phosphatase J                                    | -1.441 |
| methylprednisolone                  | --                                                                        | -1.542 |
| GCK                                 | glucokinase                                                               | -1.938 |
| PER2                                | period circadian regulator 2                                              | -2.426 |
| tetradecanal                        | --                                                                        | -2.452 |
| PCK1                                | phosphoenolpyruvate carboxykinase 1                                       | -3.131 |



**Table S2D. The non-canonical networks linked to musculoskeletal operations. Each table includes the gene symbol and gene name, and sorted based on their fold changes transformed to log scale base 2. (D) Muscle function network was enriched by 51 upregulated and 60 downregulated biomolecules. The biomolecules included 108 genes and 3 metabolites. The molecules linked to calcium ion (Ca<sup>2+</sup>) channel are highlighted.**

| Gene symbol | Entrez Gene Name                                                     | Expr Log Ratio |
|-------------|----------------------------------------------------------------------|----------------|
| KLF5        | Kruppel like factor 5                                                | 2.288          |
| SOCS1       | suppressor of cytokine signaling 1                                   | 2.023          |
| FOS         | Fos proto-oncogene, AP-1 transcription factor subunit                | 1.918          |
| RRAD        | RRAD, Ras related glycolysis inhibitor and calcium channel regulator | 1.755          |
| CDKN1A      | cyclin dependent kinase inhibitor 1A                                 | 1.558          |
| UCN2        | urocortin 2                                                          | 1.556          |
| ARNTL       | aryl hydrocarbon receptor nuclear translocator like                  | 1.531          |
| NEU3        | neuraminidase 3                                                      | 1.32           |
| SOCS3       | suppressor of cytokine signaling 3                                   | 1.319          |
| FST         | follistatin                                                          | 1.238          |
| MYBPH       | myosin binding protein H                                             | 1.168          |
| TP63        | tumor protein p63                                                    | 1.086          |
| PEG3        | paternally expressed 3                                               | 1.049          |
| ACVR2B      | activin A receptor type 2B                                           | 1.019          |
| PIM1        | Pim-1 proto-oncogene, serine/threonine kinase                        | 1.003          |
| WNT4        | Wnt family member 4                                                  | 0.821          |
| CNP         | 2',3'-cyclic nucleotide 3' phosphodiesterase                         | 0.772          |
| CHRN1       | cholinergic receptor nicotinic beta 1 subunit                        | 0.741          |
| FGFR1       | fibroblast growth factor receptor 1                                  | 0.725          |
| SORT1       | sortilin 1                                                           | 0.691          |
| STAT5B      | signal transducer and activator of transcription 5B                  | 0.636          |
| Foxp1       | forkhead box P1                                                      | 0.626          |
| SLC8A1      | solute carrier family 8 member A1                                    | 0.626          |
| PDE2A       | phosphodiesterase 2A                                                 | 0.622          |
| ZFH3        | zinc finger homeobox 3                                               | 0.607          |

|         |                                                          |        |
|---------|----------------------------------------------------------|--------|
| TRIM63  | tripartite motif containing 63                           | 0.589  |
| SLC9A1  | solute carrier family 9 member A1                        | 0.585  |
| APOBEC2 | apolipoprotein B mRNA editing enzyme catalytic subunit 2 | 0.561  |
| VASP    | vasodilator stimulated phosphoprotein                    | 0.538  |
| RARA    | retinoic acid receptor alpha                             | 0.532  |
| TRIO    | trio Rho guanine nucleotide exchange factor              | 0.527  |
| IL4R    | interleukin 4 receptor                                   | 0.523  |
| FMOD    | fibromodulin                                             | 0.519  |
| FXYP1   | FXYP domain containing ion transport regulator 1         | 0.518  |
| CDH15   | cadherin 15                                              | 0.512  |
| MYO18B  | myosin XVIIIIB                                           | 0.504  |
| SMAD3   | SMAD family member 3                                     | 0.493  |
| PPP1R1A | protein phosphatase 1 regulatory inhibitor subunit 1A    | 0.492  |
| YAP1    | Yes associated protein 1                                 | 0.492  |
| MYL12A  | myosin light chain 12A                                   | 0.473  |
| NFATC2  | nuclear factor of activated T cells 2                    | 0.458  |
| GRB10   | growth factor receptor bound protein 10                  | 0.441  |
| LMO7    | LIM domain 7                                             | 0.439  |
| PXN     | paxillin                                                 | 0.409  |
| TNNI2   | troponin I2, fast skeletal type                          | 0.409  |
| ALDOA   | aldolase, fructose-bisphosphate A                        | 0.406  |
| TGM2    | transglutaminase 2                                       | 0.393  |
| HSF1    | heat shock transcription factor 1                        | 0.391  |
| SPEG    | SPEG complex locus                                       | 0.364  |
| IL6ST   | interleukin 6 signal transducer                          | 0.359  |
| MYH4    | myosin heavy chain 4                                     | 0.311  |
| ATP     | --                                                       | -0.347 |
| MAPK1   | mitogen-activated protein kinase 1                       | -0.388 |
| UBR2    | ubiquitin protein ligase E3 component n-recognin 2       | -0.428 |
| SPAG9   | sperm associated antigen 9                               | -0.437 |
| CXCL14  | C-X-C motif chemokine ligand 14                          | -0.454 |
| TARBP2  | TARBP2, RISC loading complex RNA binding subunit         | -0.456 |
| CFL2    | cofilin 2                                                | -0.481 |

|             |                                                           |        |
|-------------|-----------------------------------------------------------|--------|
| PLEKHO1     | pleckstrin homology domain containing O1                  | -0.508 |
| MYOT        | myotilin                                                  | -0.51  |
| niacinamide | --                                                        | -0.514 |
| PTPN11      | protein tyrosine phosphatase, non-receptor type 11        | -0.515 |
| UCHL3       | ubiquitin C-terminal hydrolase L3                         | -0.557 |
| RB1CC1      | RB1 inducible coiled-coil 1                               | -0.564 |
| MAP2K1      | mitogen-activated protein kinase kinase 1                 | -0.568 |
| EIF2AK4     | eukaryotic translation initiation factor 2 alpha kinase 4 | -0.577 |
| SORBS1      | sorbin and SH3 domain containing 1                        | -0.596 |
| ACTN2       | actinin alpha 2                                           | -0.602 |
| ADK         | adenosine kinase                                          | -0.611 |
| RCAN2       | regulator of calcineurin 2                                | -0.614 |
| JARID2      | jumonji and AT-rich interaction domain containing 2       | -0.622 |
| SSPN        | sarcospan                                                 | -0.629 |
| GPCPD1      | glycerophosphocholine phosphodiesterase 1                 | -0.63  |
| CRK         | CRK proto-oncogene, adaptor protein                       | -0.645 |
| FN1         | fibronectin 1                                             | -0.65  |
| LBX1        | ladybird homeobox 1                                       | -0.653 |
| CKMT2       | creatine kinase, mitochondrial 2                          | -0.663 |
| MYL4        | myosin light chain 4                                      | -0.669 |
| MYH1        | myosin heavy chain 1                                      | -0.672 |
| BACH1       | BTB domain and CNC homolog 1                              | -0.673 |
| FHOD3       | formin homology 2 domain containing 3                     | -0.752 |
| CAT         | catalase                                                  | -0.761 |
| PRKAB2      | protein kinase AMP-activated non-catalytic subunit beta 2 | -0.779 |
| ITGAV       | integrin subunit alpha V                                  | -0.793 |
| MYBPC1      | myosin binding protein C, slow type                       | -0.806 |
| LMOD2       | leiomodulin 2                                             | -0.814 |
| GJA1        | gap junction protein alpha 1                              | -0.821 |
| QKI         | QKI, KH domain containing RNA binding                     | -0.821 |
| PLAU        | plasminogen activator, urokinase                          | -0.838 |

|         |                                                                           |        |
|---------|---------------------------------------------------------------------------|--------|
| UBR1    | ubiquitin protein ligase E3 component n-recognin 1                        | -0.855 |
| ATP1B1  | ATPase Na <sup>+</sup> /K <sup>+</sup> transporting subunit beta 1        | -0.863 |
| MB      | myoglobin                                                                 | -0.904 |
| JAK2    | Janus kinase 2                                                            | -0.911 |
| HLF     | HLF, PAR bZIP transcription factor                                        | -0.915 |
| ADP     | --                                                                        | -0.935 |
| MYOD1   | myogenic differentiation 1                                                | -1.01  |
| CD55    | CD55 molecule (Cromer blood group)                                        | -1.045 |
| TPM3    | tropomyosin 3                                                             | -1.095 |
| CEBPA   | CCAAT enhancer binding protein alpha                                      | -1.149 |
| FHL1    | four and a half LIM domains 1                                             | -1.193 |
| ATP2A2  | ATPase sarcoplasmic/endoplasmic reticulum Ca <sup>2+</sup> transporting 2 | -1.275 |
| HSD11B1 | hydroxysteroid 11-beta dehydrogenase 1                                    | -1.423 |
| MYH2    | myosin heavy chain 2                                                      | -1.473 |
| CSRP3   | cysteine and glycine rich protein 3                                       | -2.214 |
| MYOZ2   | myozenin 2                                                                | -2.245 |
| ANKRD2  | ankyrin repeat domain 2                                                   | -2.484 |
| MYL2    | myosin light chain 2                                                      | -3.344 |
| TNNT1   | troponin T1, slow skeletal type                                           | -3.629 |
| TNNC1   | troponin C1, slow skeletal and cardiac type                               | -3.922 |
| TNNI1   | troponin I1, slow skeletal type                                           | -4.478 |
| MYH7    | myosin heavy chain 7                                                      | -5.235 |

**Table S2E. The non-canonical networks linked to musculoskeletal operations. Each table includes the gene symbol and gene name, and sorted based on their fold changes transformed to log scale base 2. (E) Inflammation network was enriched by 64 upregulated and 89 downregulated biomolecules. The biomolecules included 114 genes and 39 metabolites.**

| Gene symbol        | Entrez Gene Name                                       | Expr Log Ratio |
|--------------------|--------------------------------------------------------|----------------|
| FOSB               | FosB proto-oncogene, AP-1 transcription factor subunit | 2.351          |
| SOCS1              | suppressor of cytokine signaling 1                     | 2.023          |
| FOS                | Fos proto-oncogene, AP-1 transcription factor subunit  | 1.918          |
| NFIL3              | nuclear factor, interleukin 3 regulated                | 1.663          |
| CYP26B1            | cytochrome P450 family 26 subfamily B member 1         | 1.578          |
| CDKN1A             | cyclin dependent kinase inhibitor 1A                   | 1.558          |
| SOCS3              | suppressor of cytokine signaling 3                     | 1.319          |
| NR1D1              | nuclear receptor subfamily 1 group D member 1          | 1.137          |
| TP63               | tumor protein p63                                      | 1.086          |
| PTPN22             | protein tyrosine phosphatase, non-receptor type 22     | 1.067          |
| CEBPD              | CCAAT enhancer binding protein delta                   | 1.054          |
| ABCB1              | ATP binding cassette subfamily B member 1              | 1.051          |
| PPP1R15A           | protein phosphatase 1 regulatory subunit 15A           | 0.883          |
| MVK                | mevalonate kinase                                      | 0.787          |
| CNP                | 2',3'-cyclic nucleotide 3' phosphodiesterase           | 0.772          |
| EGLN3              | egl-9 family hypoxia inducible factor 3                | 0.727          |
| FGFR1              | fibroblast growth factor receptor 1                    | 0.725          |
| MMP15              | matrix metalloproteinase 15                            | 0.711          |
| oleoylethanolamide | --                                                     | 0.665          |
| STAT5B             | signal transducer and activator of transcription 5B    | 0.636          |
| ALPK2              | alpha kinase 2                                         | 0.627          |
| PDE2A              | phosphodiesterase 2A                                   | 0.622          |
| PFKFB3             | 6-phosphofructo-2-kinase/fructose-2,6-biphosphatase 3  | 0.612          |
| SLC9A1             | solute carrier family 9 member A1                      | 0.585          |
| SPHK2              | sphingosine kinase 2                                   | 0.579          |
| SDC4               | syndecan 4                                             | 0.573          |
| ERRFI1             | ERBB receptor feedback inhibitor 1                     | 0.533          |
| TRIO               | trio Rho guanine nucleotide exchange factor            | 0.527          |
| IL4R               | interleukin 4 receptor                                 | 0.523          |
| FMOD               | fibromodulin                                           | 0.519          |
| MFGE8              | milk fat globule-EGF factor 8 protein                  | 0.518          |

|                              |                                                                  |        |
|------------------------------|------------------------------------------------------------------|--------|
| RPL11                        | ribosomal protein L11                                            | 0.506  |
| dioctyl adipate              | --                                                               | 0.501  |
| RPL13A                       | ribosomal protein L13a                                           | 0.497  |
| MIF                          | macrophage migration inhibitory factor                           | 0.494  |
| SMAD3                        | SMAD family member 3                                             | 0.493  |
| YAP1                         | Yes associated protein 1                                         | 0.492  |
| BSG                          | basigin (Ok blood group)                                         | 0.49   |
| KARS                         | lysyl-tRNA synthetase                                            | 0.484  |
| DDT                          | D-dopachrome tautomerase                                         | 0.473  |
| MYL12A                       | myosin light chain 12A                                           | 0.473  |
| DYM                          | dymeclin                                                         | 0.472  |
| BCL6                         | B cell CLL/lymphoma 6                                            | 0.464  |
| NFATC2                       | nuclear factor of activated T cells 2                            | 0.458  |
| KSR1                         | kinase suppressor of ras 1                                       | 0.453  |
| CACNG1                       | calcium voltage-gated channel auxiliary subunit gamma 1          | 0.447  |
| RPL18A                       | ribosomal protein L18a                                           | 0.445  |
| GRB10                        | growth factor receptor bound protein 10                          | 0.441  |
| RHOB                         | ras homolog family member B                                      | 0.441  |
| EIF2AK1                      | eukaryotic translation initiation factor 2 alpha kinase 1        | 0.438  |
| MYO18A                       | myosin XVIII A                                                   | 0.427  |
| AMPD1                        | adenosine monophosphate deaminase 1                              | 0.413  |
| PXN                          | paxillin                                                         | 0.409  |
| PPP1R7                       | protein phosphatase 1 regulatory subunit 7                       | 0.407  |
| ALDOA                        | aldolase, fructose-bisphosphate A                                | 0.406  |
| RPSA                         | ribosomal protein SA                                             | 0.394  |
| TGM2                         | transglutaminase 2                                               | 0.393  |
| HSF1                         | heat shock transcription factor 1                                | 0.391  |
| RPL31                        | ribosomal protein L31                                            | 0.375  |
| RPS18                        | ribosomal protein S18                                            | 0.367  |
| TRPM4                        | transient receptor potential cation channel subfamily M member 4 | 0.366  |
| MAPT                         | microtubule associated protein tau                               | 0.364  |
| IL6ST                        | interleukin 6 signal transducer                                  | 0.359  |
| mono-(2-ethylhexyl)phthalate | --                                                               | 0.249  |
| L-alanine                    | --                                                               | -0.288 |
| pyruvaldehyde                | --                                                               | -0.288 |
| malondialdehyde              | --                                                               | -0.288 |
| urethane                     | --                                                               | -0.288 |
| alanine                      | --                                                               | -0.288 |
| hyperforin                   | --                                                               | -0.302 |
| ATP                          | --                                                               | -0.347 |
| HSPA5                        | heat shock protein family A (Hsp70) member 5                     | -0.359 |
| acetic acid                  | --                                                               | -0.388 |

|                                                        |                                                           |        |
|--------------------------------------------------------|-----------------------------------------------------------|--------|
| MCL1                                                   | MCL1, BCL2 family apoptosis regulator                     | -0.412 |
| acetaminophen                                          | --                                                        | -0.424 |
| carnosine                                              | --                                                        | -0.451 |
| CXCL14                                                 | C-X-C motif chemokine ligand 14                           | -0.454 |
| SERINC3                                                | serine incorporator 3                                     | -0.49  |
| ATP8A1                                                 | ATPase phospholipid transporting 8A1                      | -0.497 |
| CPE                                                    | carboxypeptidase E                                        | -0.507 |
| ADSS                                                   | adenylosuccinate synthase                                 | -0.51  |
| niacinamide                                            | --                                                        | -0.514 |
| PTPN11                                                 | protein tyrosine phosphatase, non-receptor type 11        | -0.515 |
| PDE7A                                                  | phosphodiesterase 7A                                      | -0.55  |
| 1-oleoyl-lysophosphatidylethanolamine                  | --                                                        | -0.556 |
| glycyrrhetic acid                                      | --                                                        | -0.556 |
| RB1CC1                                                 | RB1 inducible coiled-coil 1                               | -0.564 |
| adenine                                                | --                                                        | -0.568 |
| MAP2K1                                                 | mitogen-activated protein kinase kinase 1                 | -0.568 |
| ITFG1                                                  | integrin alpha FG-GAP repeat containing 1                 | -0.573 |
| CDK19                                                  | cyclin dependent kinase 19                                | -0.575 |
| HLA-DRB5                                               | major histocompatibility complex, class II, DR beta 5     | -0.576 |
| EIF2AK4                                                | eukaryotic translation initiation factor 2 alpha kinase 4 | -0.577 |
| PCM1                                                   | pericentriolar material 1                                 | -0.577 |
| NQO1                                                   | NAD(P)H quinone dehydrogenase 1                           | -0.581 |
| CRY2                                                   | cryptochrome circadian regulator 2                        | -0.598 |
| NR1D2                                                  | nuclear receptor subfamily 1 group D member 2             | -0.6   |
| 2-16:0 lysophosphatidylethanolamine                    | --                                                        | -0.607 |
| 1-palmitoyl-2-hydroxy-sn-glycero-3-phosphoethanolamine | --                                                        | -0.607 |
| OSTM1                                                  | osteopetrosis associated transmembrane protein 1          | -0.607 |
| HLA-DQA1                                               | major histocompatibility complex, class II, DQ alpha 1    | -0.611 |
| PLAA                                                   | phospholipase A2 activating protein                       | -0.625 |
| 1-(1Z-hexadecenyl)-sn-glycero-3-phosphoethanolamine    | --                                                        | -0.626 |
| MAP3K3                                                 | mitogen-activated protein kinase kinase kinase 3          | -0.63  |
| NOTCH4                                                 | notch 4                                                   | -0.64  |

|                                                       |                                                                    |        |
|-------------------------------------------------------|--------------------------------------------------------------------|--------|
| FN1                                                   | fibronectin 1                                                      | -0.65  |
| uridine                                               | --                                                                 | -0.657 |
| pseudouridine                                         | --                                                                 | -0.657 |
| TFRC                                                  | transferrin receptor                                               | -0.672 |
| NDUFC2                                                | NADH:ubiquinone oxidoreductase subunit C2                          | -0.701 |
| L-palmitoylcarnitine                                  | --                                                                 | -0.704 |
| L-alpha-lysophosphatidylcholine, stearoyl             | --                                                                 | -0.72  |
| 1-20:4(5Z,8Z,11Z,14Z) lysophosphatidylcholine         | --                                                                 | -0.72  |
| 1-18:2(9Z,12Z) lysophosphatidylcholine                | --                                                                 | -0.727 |
| PGK1                                                  | phosphoglycerate kinase 1                                          | -0.749 |
| 1-oleoyl lysophosphatidylcholine                      | --                                                                 | -0.751 |
| 1-heptadecanoyl-2-hydroxy-sn-glycero-3-phosphocholine | --                                                                 | -0.752 |
| WIPF1                                                 | WAS/WASL interacting protein family member 1                       | -0.76  |
| psychosine                                            | --                                                                 | -0.771 |
| ADAMTS5                                               | ADAM metallopeptidase with thrombospondin type 1 motif 5           | -0.775 |
| LOXL2                                                 | lysyl oxidase like 2                                               | -0.78  |
| 5'-methylthioadenosine                                | --                                                                 | -0.782 |
| ITGAV                                                 | integrin subunit alpha V                                           | -0.793 |
| GJA1                                                  | gap junction protein alpha 1                                       | -0.821 |
| QKI                                                   | QKI, KH domain containing RNA binding                              | -0.821 |
| ADAMTS1                                               | ADAM metallopeptidase with thrombospondin type 1 motif 1           | -0.832 |
| PLAU                                                  | plasminogen activator, urokinase                                   | -0.838 |
| PHTF1                                                 | putative homeodomain transcription factor 1                        | -0.848 |
| ginsenoside Rb1                                       | --                                                                 | -0.861 |
| ATP1B1                                                | ATPase Na <sup>+</sup> /K <sup>+</sup> transporting subunit beta 1 | -0.863 |
| N-acetyl-L-phenylalanine                              | --                                                                 | -0.87  |
| 2-hydroxyhexadecanoic acid                            | --                                                                 | -0.872 |
| inosine                                               | --                                                                 | -0.876 |
| NAGLU                                                 | N-acetyl-alpha-glucosaminidase                                     | -0.9   |
| 1-14:0 lysophosphatidylcholine                        | --                                                                 | -0.909 |
| JAK2                                                  | Janus kinase 2                                                     | -0.911 |
| ADP                                                   | --                                                                 | -0.935 |



|                                 |                                                           |        |
|---------------------------------|-----------------------------------------------------------|--------|
| ADAMTS14                        | ADAM metallopeptidase with thrombospondin type 1 motif 14 | -0.943 |
| IRF5                            | interferon regulatory factor 5                            | -0.97  |
| MST1R                           | macrophage stimulating 1 receptor                         | -0.982 |
| oleoylcarnitine                 | --                                                        | -0.994 |
| Retnla                          | resistin like alpha                                       | -1.002 |
| SLC1A5                          | solute carrier family 1 member 5                          | -1.013 |
| CEBPA                           | CCAAT enhancer binding protein alpha                      | -1.149 |
| IL15                            | interleukin 15                                            | -1.176 |
| PDE7B                           | phosphodiesterase 7B                                      | -1.176 |
| adenine-riboflavin dinucleotide | --                                                        | -1.184 |
| SLC7A2                          | solute carrier family 7 member 2                          | -1.222 |
| FGFR3                           | fibroblast growth factor receptor 3                       | -1.267 |
| CES1                            | carboxylesterase 1                                        | -1.307 |
| methylprednisolone              | --                                                        | -1.542 |
| POSTN                           | periostin                                                 | -1.67  |
| TNNC1                           | troponin C1, slow skeletal and cardiac type               | -3.922 |

**Table S2F. The non-canonical networks linked to musculoskeletal operations. Each table includes the gene symbol and gene name, and sorted based on their fold changes transformed to log scale base 2. (F) Mitochondrial dysfunction network was enriched by 18 upregulated and 40 downregulated biomolecules. The biomolecules included 42 genes and 16 metabolites.**

| Gene symbol        | Entrez Gene Name                                            | Expr Log Ratio |
|--------------------|-------------------------------------------------------------|----------------|
| SLCO2A1            | solute carrier organic anion transporter family member 2A1  | 1.268          |
| TP63               | tumor protein p63                                           | 1.086          |
| NT5C2              | 5'-nucleotidase, cytosolic II                               | 0.763          |
| ACACA              | acetyl-CoA carboxylase alpha                                | 0.704          |
| oleoylethanolamide | --                                                          | 0.665          |
| COX6A2             | cytochrome c oxidase subunit 6A2                            | 0.572          |
| ENTPD6             | ectonucleoside triphosphate diphosphohydrolase 6 (putative) | 0.572          |
| VASP               | vasodilator stimulated phosphoprotein                       | 0.538          |
| MIF                | macrophage migration inhibitory factor                      | 0.494          |
| GCDH               | glutaryl-CoA dehydrogenase                                  | 0.488          |
| FIS1               | fission, mitochondrial 1                                    | 0.452          |
| EIF2AK1            | eukaryotic translation initiation factor 2 alpha kinase 1   | 0.438          |

|                   |                                                                    |        |
|-------------------|--------------------------------------------------------------------|--------|
| HSD17B10          | hydroxysteroid 17-beta dehydrogenase 10                            | 0.429  |
| MYO18A            | myosin XVIII A                                                     | 0.427  |
| ALDOA             | aldolase, fructose-bisphosphate A                                  | 0.406  |
| TGM2              | transglutaminase 2                                                 | 0.393  |
| lisuride          | --                                                                 | 0.379  |
| dibutyl phthalate | --                                                                 | 0.249  |
| pyruvaldehyde     | --                                                                 | -0.288 |
| malondialdehyde   | --                                                                 | -0.288 |
| alanine           | --                                                                 | -0.288 |
| hyperforin        | --                                                                 | -0.302 |
| ATP               | --                                                                 | -0.347 |
| HSPA5             | heat shock protein family A (Hsp70) member 5                       | -0.359 |
| NDUFS1            | NADH:ubiquinone oxidoreductase core subunit S1                     | -0.375 |
| MAPK1             | mitogen-activated protein kinase 1                                 | -0.388 |
| COX5A             | cytochrome c oxidase subunit 5A                                    | -0.406 |
| CCT4              | chaperonin containing TCP1 subunit 4                               | -0.41  |
| acetaminophen     | --                                                                 | -0.424 |
| NDUFB6            | NADH:ubiquinone oxidoreductase subunit B6                          | -0.429 |
| UQCRCF1           | ubiquinol-cytochrome c reductase, Rieske iron-sulfur polypeptide 1 | -0.441 |
| HADH              | hydroxyacyl-CoA dehydrogenase                                      | -0.476 |
| ATP5PB            | ATP synthase peripheral stalk-membrane subunit b                   | -0.519 |
| NDUFAF1           | NADH:ubiquinone oxidoreductase complex assembly factor 1           | -0.544 |
| DGAT2             | diacylglycerol O-acyltransferase 2                                 | -0.547 |
| glycyrrhetic acid | --                                                                 | -0.556 |
| UCHL3             | ubiquitin C-terminal hydrolase L3                                  | -0.557 |

|                      |                                                                                          |        |
|----------------------|------------------------------------------------------------------------------------------|--------|
| SDHD                 | succinate dehydrogenase complex subunit D                                                | -0.565 |
| adenine              | --                                                                                       | -0.568 |
| ABCD3                | ATP binding cassette subfamily D member 3                                                | -0.571 |
| PHYH                 | phytanoyl-CoA 2-hydroxylase                                                              | -0.571 |
| NQO1                 | NAD(P)H quinone dehydrogenase 1                                                          | -0.581 |
| SDHA                 | succinate dehydrogenase complex flavoprotein subunit A                                   | -0.604 |
| HADHB                | hydroxyacyl-CoA dehydrogenase trifunctional multienzyme complex subunit beta             | -0.663 |
| ATP5S                | ATP synthase, H <sup>+</sup> transporting, mitochondrial Fo complex subunit s (factor B) | -0.702 |
| L-palmitoylcarnitine | --                                                                                       | -0.704 |
| AOX1                 | aldehyde oxidase 1                                                                       | -0.733 |
| CAT                  | catalase                                                                                 | -0.761 |
| psychosine           | --                                                                                       | -0.771 |
| ATP5MC3              | ATP synthase membrane subunit c locus 3                                                  | -0.778 |
| inosine              | --                                                                                       | -0.876 |
| MB                   | myoglobin                                                                                | -0.904 |
| ADP                  | --                                                                                       | -0.935 |
| ADH1C                | alcohol dehydrogenase 1C (class I), gamma polypeptide                                    | -0.944 |
| IL15                 | interleukin 15                                                                           | -1.176 |
| SLC16A1              | solute carrier family 16 member 1                                                        | -1.269 |
| HSD11B1              | hydroxysteroid 11-beta dehydrogenase 1                                                   | -1.423 |
| methylprednisolone   | --                                                                                       | -1.542 |

**Table S3. The list of genes associated with the upstream regulators of interest, namely SOCS1, STAT5B, SMAD3, HSF1, mono-(2-ethylhexyl) phthalate and PLAU. For individual upstream regulator, the gene symbols were sorted in descending order.**

| Upstream regulator: SOCS1 |                | Upstream regulator: STAT5B |                | Upstream regulator: SMAD3           |                | Upstream regulator: HSF1 |                | Upstream regulator: mono-(2-ethylhexyl) phthalate |                | Upstream regulator: PLAU |                |
|---------------------------|----------------|----------------------------|----------------|-------------------------------------|----------------|--------------------------|----------------|---------------------------------------------------|----------------|--------------------------|----------------|
| Gene symbol               | Expr Log Ratio | Gene symbol                | Expr Log Ratio | Gene symbol                         | Expr Log Ratio | Gene symbol              | Expr Log Ratio | Gene symbol                                       | Expr Log Ratio | Gene symbol              | Expr Log Ratio |
| SOCS1                     | 2.02           | FAM89A                     | 2.29           | FOS                                 | 1.92           | RRAD                     | 1.76           | FOS                                               | 1.92           | HSPA5                    | -0.36          |
| FOS                       | 1.92           | SOCS1                      | 2.02           | CDKN1A                              | 1.56           | FBLN1                    | 1.70           | DDIT4                                             | 1.41           | FN1                      | -0.65          |
| CISH                      | 1.89           | FOS                        | 1.92           | FST                                 | 1.24           | ABCB1                    | 1.05           | BSCL2                                             | 0.49           | ITGAV                    | -0.79          |
| CDKN1A                    | 1.56           | CISH                       | 1.89           | PMEPA1                              | 0.53           | UBC                      | 0.89           | NDUFS1                                            | -0.38          | GJA1                     | -0.82          |
| SOCS3                     | 1.32           | FBLN1                      | 1.70           | JUND                                | 0.52           | SPHK2                    | 0.58           | PDHB                                              | -0.42          | PLAU                     | -0.84          |
| IL4R                      | 0.52           | CYP26B1                    | 1.58           | SMAD3                               | 0.49           | FMOD                     | 0.52           | UQCRRS1                                           | -0.44          | Retnla                   | -1.00          |
| TGM2                      | 0.39           | CDKN1A                     | 1.56           | RHOB                                | 0.44           | PTOV1                    | 0.48           | HADH                                              | -0.48          |                          |                |
| JAK2                      | -0.91          | SOCS3                      | 1.32           | GLS                                 | -0.51          | NFATC2                   | 0.46           | ATP5PB                                            | -0.52          |                          |                |
| Retnla                    | -1.00          | ABCB1                      | 1.05           | FN1                                 | -0.65          | HSF1                     | 0.39           | DGAT2                                             | -0.55          |                          |                |
| IL15                      | -1.18          | PIM1                       | 1.00           | stearoyl                            | -0.72          | MAPT                     | 0.36           | SDHD                                              | -0.57          |                          |                |
|                           |                |                            |                | 1-oleoyl<br>lysophosphatidylcholine |                |                          |                |                                                   |                |                          |                |
|                           |                | PPP1R3C                    | 0.94           | oline                               | -0.75          | CCT4                     | -0.41          | SDHA                                              | -0.60          |                          |                |
|                           |                | STAT5B                     | 0.64           | MYOD1                               | -1.01          | MCL1                     | -0.41          | HK2                                               | -0.66          |                          |                |
|                           |                | COX6A2                     | 0.57           | TPM3                                | -1.10          | EIF4A2                   | -0.57          | PGK1                                              | -0.75          |                          |                |
|                           |                | BCL6                       | 0.46           | IL15                                | -1.18          | BAG3                     | -0.59          | CEBPA                                             | -1.15          |                          |                |
|                           |                | KSR1                       | 0.45           |                                     |                | JARID2                   | -0.62          | GCK                                               | -1.94          |                          |                |
|                           |                | MCL1                       | -0.41          |                                     |                | PGK1                     | -0.75          | PCK1                                              | -3.13          |                          |                |
|                           |                | DGAT2                      | -0.55          |                                     |                | ZFAND2A                  | -0.75          |                                                   |                |                          |                |
|                           |                | NQO1                       | -0.58          |                                     |                | DNAJA1                   | -1.01          |                                                   |                |                          |                |

|  |         |       |  |  |       |       |  |  |  |  |
|--|---------|-------|--|--|-------|-------|--|--|--|--|
|  | SLC47A1 | -0.64 |  |  | CCT6A | -1.21 |  |  |  |  |
|  | CKMT2   | -0.66 |  |  |       |       |  |  |  |  |
|  | MYL4    | -0.67 |  |  |       |       |  |  |  |  |
|  | MYH1    | -0.67 |  |  |       |       |  |  |  |  |
|  | MB      | -0.90 |  |  |       |       |  |  |  |  |
|  | Retnla  | -1.00 |  |  |       |       |  |  |  |  |
|  | TPM3    | -1.10 |  |  |       |       |  |  |  |  |
|  | ATP2A2  | -1.28 |  |  |       |       |  |  |  |  |
|  | NUDT7   | -1.42 |  |  |       |       |  |  |  |  |
|  | GCK     | -1.94 |  |  |       |       |  |  |  |  |
|  | CSR3    | -2.21 |  |  |       |       |  |  |  |  |
|  | MYL2    | -3.34 |  |  |       |       |  |  |  |  |
|  | TNNT1   | -3.63 |  |  |       |       |  |  |  |  |
|  | TNNC1   | -3.92 |  |  |       |       |  |  |  |  |
|  | TNNI1   | -4.48 |  |  |       |       |  |  |  |  |
|  | MYH7    | -5.24 |  |  |       |       |  |  |  |  |
